# Supplementary material for: Gene Organization in Rice Revealed by Full-Length cDNA Mapping and Gene Expression Analysis through Microarray
Source: PLoS One. 2007 Nov 28;2(11):e1235. doi: 10.1371/journal.pone.0001235 (PMC2084198; doi:10.1371/journal.pone.0001235)
Supplement: Table S4 — The correlation coefficient between the density of TE-related locus and the density of locus based on signal intensity under each locus type (0.01 MB XLS) [file pone.0001235.s006.xls]

## Sheet: Table S4
			Table S4 The correlation coefficient between the density of TE-related locus and the density of locus based on signal intensity under each locus type
				Det0	Det1	Det2
			FL-AE	0.627554	0.657698	-0.77188
			FL-NAE	-0.25153	-0.0381597	0.128746
			CDS-ANE	0.719352	0.100279	-0.673473
