# Supplementary material for: Gene Organization in Rice Revealed by Full-Length cDNA Mapping and Gene Expression Analysis through Microarray
Source: PLoS One. 2007 Nov 28;2(11):e1235. doi: 10.1371/journal.pone.0001235 (PMC2084198; doi:10.1371/journal.pone.0001235)
Supplement: Table S6 — The frequency of Arabidopsis homologous genes between mapped and un-mapped FL-cDNA clones (0.02 MB XLS) [file pone.0001235.s008.xls]

## Sheet: TableS6
				Table S6. The frequency of Arabidopsis homologous genes between mapped and un-mapped FL-cDNA clones
					Total	HH	LH	NH
				mapped	32745	17738	7099	7908
				unmapped	2321	821a	526	974b
				a: frequency of unmapped FL-cDNA is significantly lower than that of mapped FL-cDNA (P<0.01, calculated by chi-squared test)
				b: frequency of unmapped FL-cDNA is significantly higher than that of mapped FL-cDNA (P<0.01, calculated by chi-squared test)
